# Supplementary material
Source: publisher figshare collection journal article supplement (https://springernature.figshare.com/ndownloader/files/7100201)
Supplement: Supplementary file [file 7100201]

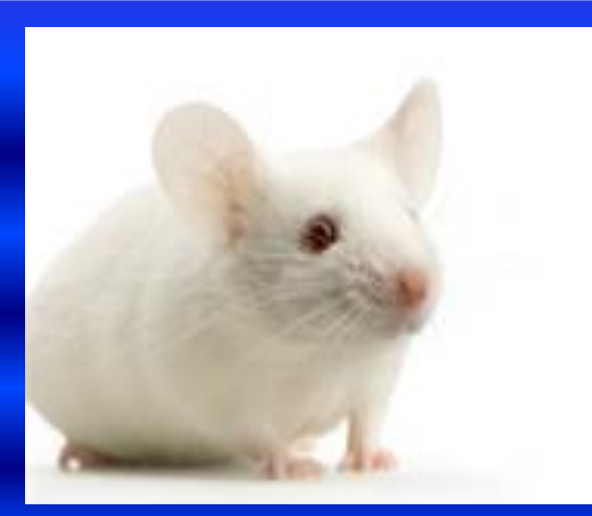

FVB/N

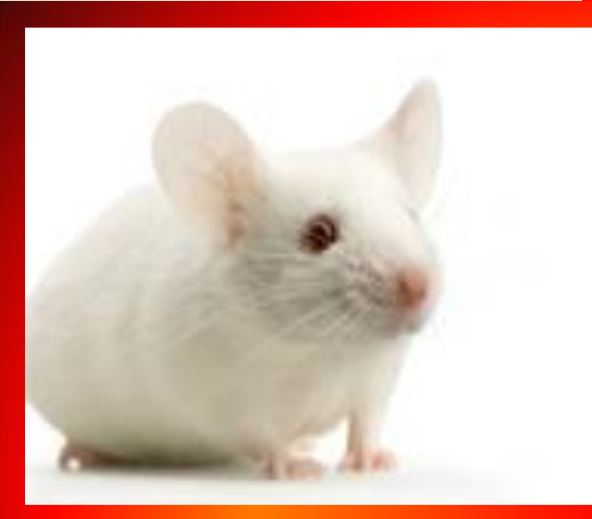

*Mdr1a*<sup>-/-</sup>

## AIN-76A diet + Inoculation

12 FVB/N, 12 *Mdr1a*<sup>-/-</sup>

Current (inoculation)  
study

## AIN-76A (control) diet

12 FVB/N, 12 *Mdr1a*<sup>-/-</sup>

## AIN-76A diet + 0.2% Curcumin

12 FVB/N, 12 *Mdr1a*<sup>-/-</sup>

## AIN-76A diet + 0.1% Rutin

12 FVB/N, 12 *Mdr1a*<sup>-/-</sup>

Previously reported  
(dietary polyphenols)  
study

## AIN-76A diet + 0.6% Green Tea Polyphenols

12 FVB/N, 12 *Mdr1a*<sup>-/-</sup>

Body weight and disease activity index

Oral gavage  
with EF.CIF  
(inoculation  
study only)

Food intake

Tissue  
samples

0

4

8

12

16

20

24

Age  
(wks)

Pre-trial Period  
(standard chow)

Adaptation  
(AIN-76A)

Experimental Period
